# Supplementary material for: Access to and Utilization of Wild Species for Food and Nutrition Security in Teso and Acholi Sub-regions of Uganda
Source: Frontiers journal article supplement (doi:10.3389/fsufs.2022.836212), 2022-06-28
Supplement: Table_1.docx [file Table_1.docx]

**Supplementary Material Table 1** **Locally available wild species in Teso and Acholi sub-region**

| **No** | **Wild Species** | | **Species** | **Teso sub-region** | | **Acholi sub-region** | |
| --- | --- | --- | --- | --- | --- | --- | --- |
| **Current Period (2017)** | **Past Period (1997)** | **Current Period (2017)** | **Past Period (1997)** |
| **Folk Taxonomy (English)** | **Scientific Taxonomy** |
| 1 | Abuu |  | Animal |  |  | 1 | 1 |
| 2 | Acawoi | Aframomum alboviolaceum | Fruit | 1 | 1 |  |  |
| 3 | Achoga (Tree) | Hymenocardia acida | Fruit |  |  | 1 | 1 |
| 4 | Acomai/Ecomai (Desert date leaves) | Balanites aegyptica | Leafy vegetable | 1 | 1 |  |  |
| 5 | Acuga (Carandas plum) | Carissa edulis | Fruit |  |  | 1 | 1 |
| 6 | Aderit |  | Bird | 1 | 1 |  |  |
| 7 | Afoyo/Apwoyo/Apoyo (Rabbit) |  | Animal |  |  | 1 | 1 |
| 8 | Agware |  | Bird | 1 | 1 |  |  |
| 9 | Aimuria |  | Fruit | 1 | 1 |  |  |
| 10 | Aisolen |  | Bird | 1 | 1 |  |  |
| 11 | Ajojot |  | Animal |  |  | 1 | 1 |
| 12 | Akicir |  | Bird | 1 | 1 |  |  |
| 13 | Akilipalabek |  | Bird |  |  | 1 | 1 |
| 14 | Akit emir | Oxygonum sinuatum | Leafy vegetable | 1 | 1 |  |  |
| 15 | Akongu ameere |  | Stem/root/tuber | 1 | 1 |  |  |
| 16 | Akuri (Doves) |  | Bird |  |  | 1 | 1 |
| 17 | Akwenyi |  | Bird | 1 | 1 |  |  |
| 18 | Akwi |  | Bird |  |  | 1 | 1 |
| 19 | Alamai/Elamai (hog plum) | Ximenia americana | Fruit | 1 | 1 |  |  |
| 20 | Alilot | Corchorus trilocularis | Leafy vegetable | 1 | 1 |  |  |
| 21 | Aluru/Atureik (Quid Bird) |  | Bird | 1 | 1 |  |  |
| 22 | Alwu |  | Bird |  |  | 1 | 1 |
| 23 | Amili |  | Animal |  |  | 1 | 1 |
| 24 | Amorodoki |  | Stem/root/tuber | 1 | 1 |  |  |
| 25 | Amucogoret |  | Bird | 1 | 1 |  |  |
| 26 | Amuget |  | Animal |  | 1 |  |  |
| 27 | Amur lacek (Bush duiker) |  | Animal |  |  | 1 | 1 |
| 28 | Amuria (Black Berries) |  | Fruit | 1 | 1 |  |  |
| 29 | Antelope |  | Animal | 1 | 1 | 1 | 1 |
| 30 | Anyara/Anyeri (Edible rat) |  | Animal |  |  | 1 | 1 |
| 31 | Apal Akalong |  | Animal | 1 | 1 |  |  |
| 32 | Apeduru/Epeduru/Epaduru (Tamarind) | Tamarindus indica | Fruit | 1 | 1 |  |  |
| 33 | Apoli |  | Animal |  |  | 1 | 1 |
| 34 | Apuri |  | Bird |  |  | 1 | 1 |
| 35 | Aribe |  | Bird |  |  | 1 | 1 |
| 36 | Aryambogo |  | Animal | 1 | 1 |  |  |
| 37 | Asawe |  | Fruit | 1 | 1 |  |  |
| 38 | Atakura |  | Bird | 1 | 1 |  |  |
| 39 | Atigo (Jute) | Corchorus olitorius | Leafy vegetable | 1 | 1 |  |  |
| 40 | Atigu |  | Stem/root/tuber |  |  | 1 | 1 |
| 41 | Atotowe |  | Bird | 1 |  |  |  |
| 42 | Aupuek/Apupu (Hedgehog) |  | Animal | 1 | 1 |  |  |
| 43 | Avu |  | Animal |  |  | 1 | 1 |
| 44 | Aweno (Guinea Fowl) |  | Bird | 1 | 1 | 1 | 1 |
| 45 | Ayira/Ayita (Squirrel) |  | Animal | 1 | 1 | 1 | 1 |
| 46 | Ayom (Monkey) |  | Animal |  |  | 1 | 1 |
| 47 | Ayweri |  | Bird |  |  | 1 | 1 |
| 48 | Baboon |  | Animal |  |  | 1 | 1 |
| 49 | Bats |  | Bird | 1 | 1 | 1 | 1 |
| 50 | Bees/Honey |  | Insect | 1 | 1 |  |  |
| 51 | Boh Ayom |  | Leafy vegetable | |  | 1 | 1 |
| 52 | Borogwe |  | Stem/root/tuber |  |  | 0 | 1 |
| 53 | Bunyo |  | Animal |  |  | 1 | 1 |
| 54 | Cashewnut |  | Fruit | 1 | 1 | 1 | 1 |
| 55 | Catfish |  | Auqatic | 1 | 1 |  |  |
| 56 | Cene |  | Fruit |  |  | 1 | 1 |
| 57 | Cumo (Monkey guava) | Diospyros mespiliformis | Fruit |  |  |  | 1 |
| 58 | Cwaa |  | Leafy vegetable | |  | 0 | 1 |
| 59 | Dolo |  | Fruit |  |  | 1 | 1 |
| 60 | Donkey |  | Animal |  |  | 1 | 1 |
| 61 | Ebaat/Emenya |  | Animal | 1 | 1 |  |  |
| 62 | Ebagu |  | Animal | 1 | 1 |  |  |
| 63 | Eboga (Amaranth Spinach) | Asystasia mysorensis (synonym A. schimperi) | Leafy vegetable | 1 | 1 |  |  |
| 64 | Ebuollo |  | Fruit | 1 | 1 |  |  |
| 65 | Eburu |  | Insect | 1 | 1 |  |  |
| 66 | Ebuyu (edible rat) |  | Animal | 1 | 1 |  |  |
| 67 | Ecadoi (Spider Stem/root/tuber) | Gynandropsis gynandra | Stem/root/tuber | 1 | 1 |  |  |
| 68 | Ecodokoko | Ipomea eriocarpa | Leafy vegetable | 1 | 1 |  |  |
| 69 | Ecototo | Asystasia mysorensis (synonym A. schimperi) | Leafy vegetable | 1 | 1 |  |  |
| 70 | Ecwilly |  | Animal |  | 1 |  |  |
| 71 | Edakamuro |  | Animal | 1 | 1 |  |  |
| 72 | Edidi |  | Stem/root/tuber | 1 | 1 |  |  |
| 73 | Ediira |  | Bird | 1 | 1 |  |  |
| 74 | Edikideki |  | Bird | 1 | 1 |  |  |
| 75 | Edioli (Bead-bean tree) | Maerua angolensis DC. | Leafy vegetable | 1 | 1 |  |  |
| 76 | Edokomunyo |  | Animal | 1 | 1 |  |  |
| 77 | Edomelu/Omelekes (Edible Rat) |  | Animal | 1 | 1 | 1 | 1 |
| 78 | Edudu |  | Bird | 1 | 1 |  |  |
| 79 | Eedo (American sicklepod) | Cassia obtusifolia | Stem/root/tuber | 1 | 1 |  |  |
| 80 | Egor Amuleget |  | Bird | 1 | 1 |  |  |
| 81 | Egwang (Wild Cat) |  | Animal | 1 | 1 |  |  |
| 82 | Ejambura |  | Fruit | 1 | 1 |  |  |
| 83 | Ekarukei (Black plum) | Vitex doniana | Fruit | 1 | 1 |  |  |
| 84 | Ekera Apesuru |  | Fruit | 1 | 1 |  |  |
| 85 | Ekiliton | Acalypha lanceolata | Stem/root/tuber | 1 | 1 |  |  |
| 86 | Ekoropot | Commelina africana | Fruit | 1 | 1 |  |  |
| 87 | Ekum (African ebony) | Diospyros mespiliforms | Fruit | 1 | 1 |  |  |
| 88 | Ekunguru/Eduu (Shea-butter tree) | Vitellaria paradox | Fruit | 1 | 1 | 1 | 1 |
| 89 | Ekunyuk |  | Animal | 1 | 1 |  |  |
| 90 | Elese |  | Animal | 1 | 1 |  |  |
| 91 | Elukei |  | Bird | 1 | 1 |  |  |
| 92 | Emelekes (Edible Rat) |  | Animal | 1 | 1 |  |  |
| 93 | Emelekuda |  | Stem/root/tuber | 1 | 1 |  |  |
| 94 | Emolodok |  | Stem/root/tuber | 1 | 1 |  |  |
| 95 | Emoros | Cyphostema denocaole | Leafy vegetable | 1 | 1 |  |  |
| 96 | Enyuru/Inyurui/Anyuru |  | Animal | 1 | 1 |  |  |
| 97 | Eodo |  | Stem/root/tuber | 1 | 1 |  |  |
| 98 | Eputir (Warthog) |  | Animal | 1 | 1 |  |  |
| 99 | Eputir (Warthog) |  | Animal |  |  | 1 | 1 |
| 100 | Eriecho | Bridelia scleronuera | Stem/root/tuber | 1 | 1 |  |  |
| 101 | Erukei |  | Bird | 1 | 1 |  |  |
| 102 | Esoriberi |  | Bird | 1 | 1 |  |  |
| 103 | Eturukuk |  | Bird |  | 1 |  |  |
| 104 | Etyangtanga |  | Stem/root/tuber | 1 | 1 |  |  |
| 105 | Ewaya | Rhus vulgaris | Fruit | 1 | 1 |  |  |
| 106 | Ewe (Pocupine) |  | Animal | 1 | 1 |  |  |
| 107 | Ewodo |  | Stem/root/tuber | 1 | 1 |  |  |
| 108 | Fomo |  | Fruit |  |  | 1 | 1 |
| 109 | Fox |  | Animal | 1 | 1 |  |  |
| 110 | Fuura |  | Fruit |  |  | 1 | 1 |
| 111 | Goo |  | Animal |  |  | 1 | 1 |
| 112 | Grasshopper |  | Insect | 1 | 1 | 1 | 1 |
| 113 | Guava | Psidium guajava | Fruit | 1 | 1 |  |  |
| 114 | Hare/Eculi/Iculin/Ipoo |  | Animal | 1 | 1 |  |  |
| 115 | Hedgehog |  | Animal |  |  | 1 | 1 |
| 116 | Hyena |  | Animal | 1 | 1 |  |  |
| 117 | Idekaluwa |  | Animal | 1 | 1 |  |  |
| 118 | Iduduma/Aiduduma | Physalis peruviana | Fruit | 1 | 1 |  |  |
| 119 | Igoruna |  | Bird | 1 | 1 |  |  |
| 120 | Ikomolong |  | Animal | 1 | 1 |  |  |
| 121 | Iladin |  | Auqatic | 1 | 1 |  |  |
| 122 | Ilesia/Iles |  | Auqatic | 1 | 1 |  |  |
| 123 | Ilobai |  | Animal | 1 | 1 |  |  |
| 124 | Inootai |  | Animal | 1 | 1 |  |  |
| 125 | Ipoot Ya Ekutwi |  | Animal | 1 | 1 |  |  |
| 126 | Ipoot Yeni Okutaari |  | Animal | 1 | 1 |  |  |
| 127 | Isolet |  | Insect | 1 | 1 |  |  |
| 128 | Jobi (Buffaloes) |  | Animal |  |  | 1 | 1 |
| 129 | Jobi (Buffaloes) |  | Animal |  | 1 |  |  |
| 130 | Kakukulu |  | Bird |  |  | 0 | 1 |
| 131 | Karoli |  | Bird |  |  | 1 | 1 |
| 132 | Kob |  | Animal |  |  | 1 | 1 |
| 133 | Kongo ogwal (Cape goose berry) | Physalis peruviana | Fruit |  |  | 1 | 1 |
| 134 | Kul |  | Animal |  |  | 1 | 1 |
| 135 | Kwen |  | Insect |  |  | 1 | 1 |
| 136 | Kworo |  | Fruit |  |  | 1 | 1 |
| 137 | Lager |  | Leafy vegetable | |  | 1 | 1 |
| 138 | Lakwal |  | Fruit |  |  | 1 | 1 |
| 139 | Lakwonkal |  | Stem/root/tuber |  |  | 1 | 1 |
| 140 | Lion |  | Animal |  | 1 |  |  |
| 141 | Luga |  | Stem/root/tuber |  |  | 0 | 1 |
| 142 | Lugaluga |  | Bird |  |  | 0 | 1 |
| 143 | Lukwara |  | Bird |  |  | 1 | 1 |
| 144 | Lungfish |  | Auqatic | 1 | 1 |  |  |
| 145 | Malakwang (tree hibiscus) | Hibiscus sabdariffa | Fruit |  |  | 1 | 1 |
| 146 | Mangoes |  | Fruit | 1 | 1 |  |  |
| 147 | Mole Rat |  | Animal |  |  | 1 | 1 |
| 148 | Monitor Lizard |  | Animal | 1 | 1 |  |  |
| 149 | Monkey |  | Stem/root/tuber |  |  | 1 | 1 |
| 150 | Mushroom |  | Stem/root/tuber |  |  | 1 | 1 |
| 151 | Mushroom |  | Stem/root/tuber | 1 | 1 |  |  |
| 152 | Mwok |  | Animal |  |  | 1 | 1 |
| 153 | Mwonyo/Pwomo (African peach) | Nauclea latifolia | Fruit |  |  | 1 | 1 |
| 154 | Obagu |  | Animal |  |  | 1 | 1 |
| 155 | Obolo/Obwolo | Annona senegalensis (syn. A. chrysophylla) | Fruit |  |  | 1 | 1 |
| 156 | Ochayo |  | Fruit |  |  | 1 | 1 |
| 157 | Ochene |  | Insect |  |  | 1 | 1 |
| 158 | Ocuga (Carandas plum) | Carissa edulis | Fruit |  |  | 1 | 1 |
| 159 | Ojiku |  | Insect |  |  | 1 | 1 |
| 160 | Ojugu |  | Insect |  |  | 1 | 1 |
| 161 | Okengo |  | Leafy vegetable | |  | 1 | 1 |
| 162 | Okile |  | Animal |  |  | 1 | 1 |
| 163 | Okir |  | Animal |  |  | 1 | 1 |
| 164 | Okok |  | Insect |  |  | 1 | 1 |
| 165 | Okong |  | Animal |  |  | 1 | 1 |
| 166 | Okuma |  | Animal |  |  | 1 | 1 |
| 167 | Olango |  | Stem/root/tuber |  |  | 1 | 1 |
| 168 | Oleleme |  | Fruit |  |  | 1 | 1 |
| 169 | Olemo |  | Fruit |  |  | 1 | 1 |
| 170 | Olok (wild grape) |  | Fruit |  |  | 1 | 1 |
| 171 | Ongora |  | Insect |  |  | 1 | 1 |
| 172 | Opegolum (Wild pig) |  | Animal |  |  | 1 | 1 |
| 173 | Opii |  | Stem/root/tuber | 1 | 1 |  |  |
| 174 | Opobo |  | Fruit |  |  | 1 | 1 |
| 175 | Otatanyo |  | Insect |  |  | 1 | 1 |
| 176 | Otatau |  | Insect |  |  | 1 | 1 |
| 177 | Otigolum (Jews melon) | Hibiscuss spp | Stem/root/tuber |  |  | 1 | 1 |
| 178 | Otungo |  | Insect |  |  | 1 | 1 |
| 179 | Oyado | Senna sp. | Stem/root/tuber |  |  | 1 | 1 |
| 180 | Oyek |  | Insect |  |  | 1 | 1 |
| 181 | Oyoo |  | Animal |  |  | 1 | 1 |
| 182 | Oywelo |  | Fruit |  |  | 1 | 1 |
| 183 | Pawpaw |  | Fruit | 1 | 1 |  |  |
| 184 | Puura |  | Fruit |  |  | 1 | 1 |
| 185 | Raa (Hippo) | Hippopotamus amphibius | Animal |  |  | 1 | 1 |
| 186 | Rabbits |  | Animal | 1 | 1 | 1 | 1 |
| 187 | Rhinoceros |  | Animal |  |  | 1 | 1 |
| 188 | Ruda |  | Animal |  |  | 1 | 1 |
| 189 | Silverfish |  | Auqatic | 1 | 1 |  |  |
| 190 | Termites |  | Insect | 1 | 1 |  |  |
| 191 | Tortoise |  | Animal | 1 | 1 |  |  |
| 192 | White Ants |  | Insect | 1 | 1 | 1 | 1 |
| 193 | Wild Duck |  | Bird | 1 | 1 | 1 | 1 |
| 194 | Wild Pig |  | Animal |  | 1 |  |  |
| 195 | Yaa (Shea-butter tree) | Vitellaria paradox | Fruit |  |  | 1 | 1 |
